# Supplementary material for: Design of a dual-signaling sensing system for fluorescent ratiometric detection of Al3+ ion based on the inner-filter effect
Source: Royal Society of Chemistry journal article supplement (doi:10.1039/c1an15566k), 2011-01-01
Supplement: c1an15566k.pdf [file c1an15566k.pdf]

# **Design a Dual-Signaling Sensing System for Fluorescent Ratiometric Detection of Al<sup>3+</sup> Ion based on Inner-Filter Effect**

Yongxiang Wang, Limin Xiong, Fenghua Geng, Fuqiang Zhang, Maotian Xu\*

Henan Key Laboratory Cultivation Base of Nanobiological Analytical Chemistry, College of  
Chemistry and Chemical Engineering, Shangqiu Normal University, Shangqiu, 476000, China

**Table S1.** Summary of some optical Al<sup>3+</sup> sensors operated in water.

| Method       | lower detectable limit <sup>#</sup> | Sensitivity | Working mode          |
|--------------|-------------------------------------|-------------|-----------------------|
| TMPyP-ARS    | 0.1 $\mu\text{M}$                   | High        | Dual-signal turn on   |
| Chemosensors | 0.1 $\mu\text{M}$ <sup>9(a)</sup>   | High        | Single-signal turn on |
|              | 10 $\mu\text{M}$ <sup>9(b)</sup>    | Low         | Single-signal turn on |
|              | 1 $\mu\text{M}$ <sup>9(c)</sup>     | Good        | Single-signal turn on |
|              | 2 $\mu\text{M}$ <sup>20</sup>       | Good        | DCF enhanced          |
|              | 2 $\mu\text{M}$ <sup>38</sup>       | Good        | DCF turn on           |

<sup>#</sup> Lower detectable limit was used here because there are no LOD in these papers.

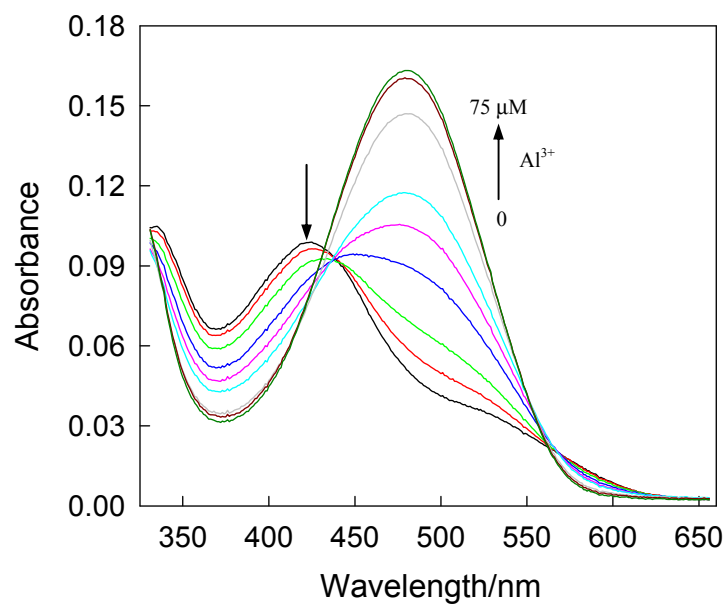

**Fig. S1.** Investigation on the interaction between ARS (30  $\mu\text{M}$ ) and  $\text{Al}^{3+}$  by Uv-vis spectroscopy by addition of different amounts  $\text{Al}^{3+}$  (0, 1.0, 2.5, 5.0, 7.5, 10, 25, 50 and 75  $\mu\text{M}$ ) in HAc-NaAc buffer solution. The arrows indicate the signal changes as increases in  $\text{Al}^{3+}$  ion concentrations.

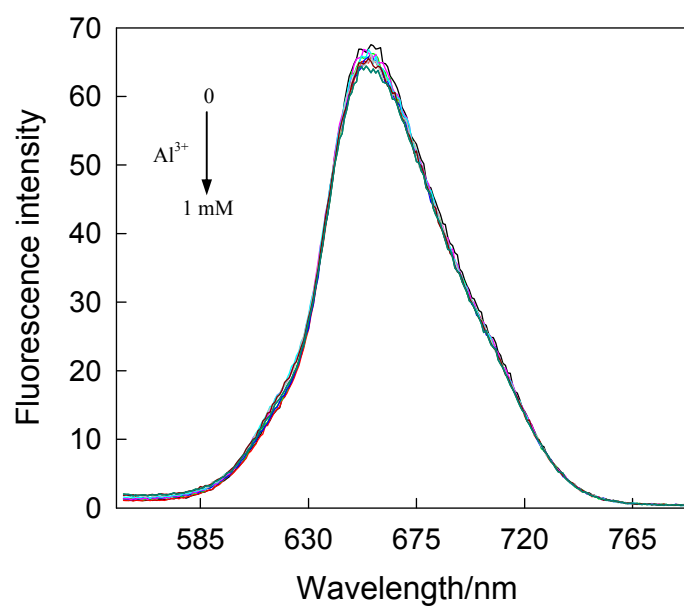

**Fig. S2.** Fluorescence emission spectral changes of TMPyP (1.0 μM) in HAC-NaAc buffer upon addition of different concentrations of Al<sup>3+</sup> (0, 0.01, 0.05, 0.1, 0.5 and 1 mM). The arrow indicates the signal changes as increases in Al<sup>3+</sup> ion concentrations. Spectra were acquired in HAC-NaAc with excitation at 422 nm.

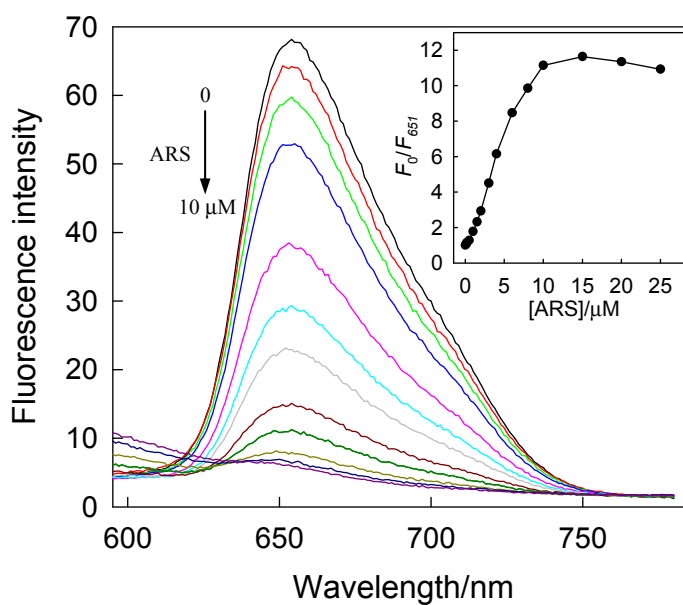

**Fig. S3.** Effects of ARS (0, 0.1, 0.2, 0.5, 1, 1.5, 2, 3, 4, 6, 8 and 10  $\mu\text{M}$ ) on the fluorescence emission spectra of TMPyP (0.1  $\mu\text{M}$ ) in HAc-NaAc (pH 5.5) buffer solution. The arrow indicates the fluorescence quenching as increase ARS concentrations. The excitation wavelength was 422 nm. Inset: Quenching efficiency ( $F_0/F_{651}$ ) as a function of ARS concentrations.  $F_0$  and  $F_{651}$  represent the fluorescence intensity at 651 nm in the absence or presence of different concentrations of  $\text{Al}^{3+}$ , respectively.

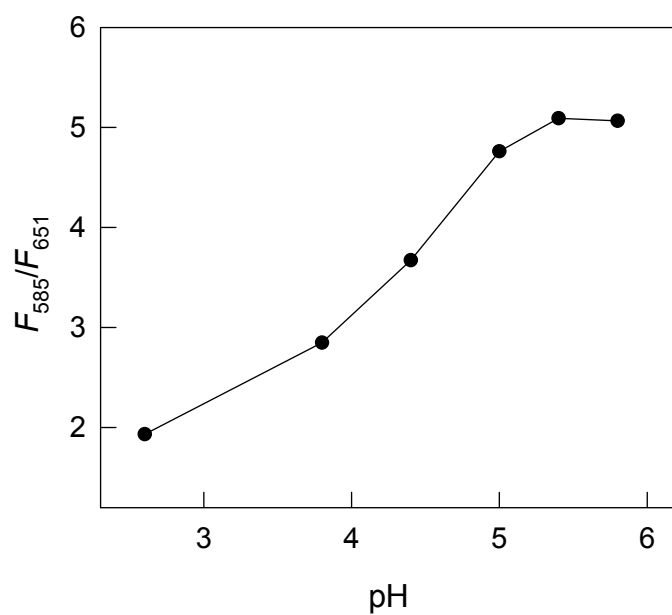

**Fig. S4.** Effect of pH on the fluorescent ratio ( $F_{585}/F_0$ ) response of ARS-TMPyP complex to  $\text{Al}^{3+}$ .  $F_{585}$  and  $F_0$  represent the fluorescence intensity at 585 nm in the presence of  $5 \mu\text{M Al}^{3+}$ , respectively.

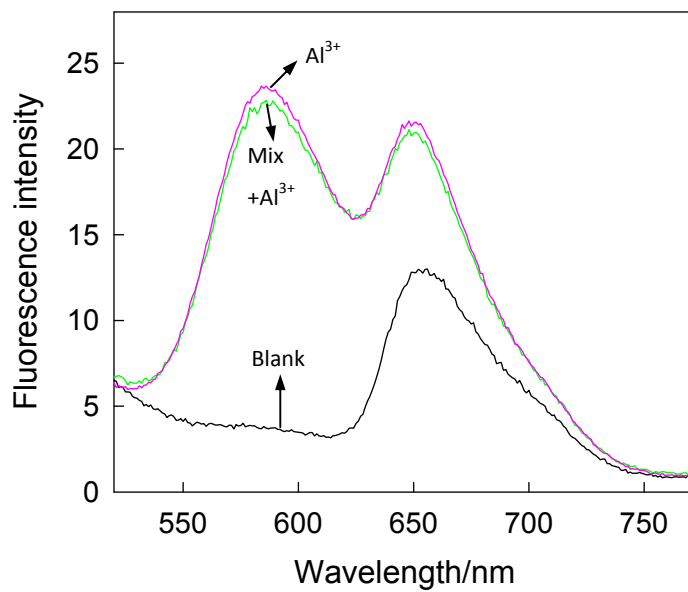

**Fig. S5.** Fluorescence emission spectra of the ARS/TMPyP complex after the addition of Al<sup>3+</sup> (5  $\mu$ M) or the mixed metal ions (5  $\mu$ M).
